# Supplementary material
Source: publisher figshare collection journal article supplement (https://frontiersin.figshare.com/ndownloader/files/13355051)
Supplement: Supplementary file 1 [file 13355051]

Supplementary Table 1. Significant pairwise comparisons for total number of eggs laid on each milkweed species during June-August 2015 when all demonstration sites were combined. A Tukey’s range test was used to adjust p-values for multiple comparisons. EXA= *A. exaltata* (poke milkweed), HIR= *A. hirtella* (tall green milkweed), INC=*A. incarnata* (swamp milkweed), LAE= *C. laeve* (honeyvine milkweed), SPE= *A. speciosa* (showy milkweed), SUL= *A. sullivantii* (prairie milkweed), SYR= *A. syriaca* (common milkweed), TUB= *A. tuberosa* (butterfly milkweed), and VER= *A. verticillata* (whorled milkweed).

| Milkweed Species Comparison | Total Egg Estimate | S.E. | z-ratio | p-value |
| --- | --- | --- | --- | --- |
| EXA-INC | -1.10 | 0.27 | -7.10 | <0.001 |
| EXA-SPE | -1.27 | 0.25 | -4.78 | <0.0001 |
| EXA-SUL | -1.40 | 0.26 | -5.35 | <0.0001 |
| EXA-SYR | -1.68 | 0.26 | -6.59 | <0.0001 |
| EXA-TUB | -0.916 | 0.28 | -3.29 | 0.028 |
| HIR-INC | -0.831 | 0.16 | -5.10 | <0.0001 |
| HIR-SYR | -0.586 | 0.17 | -3.45 | 0.015 |
| INC-LAE | 1.42 | 0.20 | 7.01 | <0.0001 |
| INC-SPE | 0.661 | 0.15 | 4.31 | <0.001 |
| INC-SUL | 0.530 | 0.15 | 3.16 | 0.009 |
| INC-TUB | 1.01 | 0.17 | 5.85 | <0.0001 |
| INC-VER | 1.21 | 0.18 | 6.49 | <0.0001 |
| LAE-SPE | -0.760 | 0.22 | -3.44 | 0.017 |
| LAE-SUL | -0.889 | 0.21 | -4.12 | 0.001 |
| LAE-SYR | -1.17 | 0.21 | -5.65 | <0.0001 |
| SUL-VER | 0.680 | 0.20 | 3.38 | 0.021 |
| SYR-TUB | 0.768 | 0.18 | 4.26 | 0.0007 |
| SYR-VER | 0.964 | 0.19 | 4.28 | <0.001 |

Supplementary Table 2. Significant pairwise comparisons for total number of eggs laid on each milkweed species during June-July 2015 when all demonstration sites were combined. A Tukey’s range test was used to adjust p-values for multiple comparisons. EXA= *A. exaltata* (poke milkweed), HIR= *A. hirtella* (tall green milkweed), INC=*A. incarnata* (swamp milkweed), LAE= *C. laeve* (honeyvine milkweed), SPE= *A. speciosa* (showy milkweed), SUL= *A. sullivantii* (prairie milkweed), SYR= *A. syriaca* (common milkweed), TUB= *A. tuberosa* (butterfly milkweed), and VER= *A. verticillata* (whorled milkweed

| Milkweed Species Comparison | Total Egg Estimate | S.E. | z-ratio | p-value |
| --- | --- | --- | --- | --- |
| EXA-HIR | -1.41 | 0.348 | -4.04 | 0.002 |
| EXA-INC | -1.50 | 0.349 | -4.35 | 0.0005 |
| EXA-SUL | -1.25 | 0.355 | -3.53 | 0.024 |
| HIR-LAE | 1.32 | 0.335 | 3.91 | 0.003 |
| HIR-TUB | 0.941 | 0.292 | 3.23 | 0.034 |
| INC-LAE | 1.41 | 0.332 | 4.23 | 0.0008 |
| INC-TUB | 1.03 | 0.29 | 3.59 | 0.010 |
| INC-VER | 0.86 | 0.27 | 3.18 | 0.038 |
| LAE-SUL | -1.15 | 0.342 | 3.38 | 0.021 |

Supplementary Table 3. Significant pairwise comparisons for total number of eggs laid on each milkweed species during July-August 2015 when all demonstration sites were combined. A Tukey’s range test was used to adjust p-values for multiple comparisons. INC=*A. incarnata* (swamp milkweed), LAE= *C. laeve* (honeyvine milkweed), SUL= *A. sullivantii* (prairie milkweed), SYR= *A. syriaca* (common milkweed), TUB= *A. tuberosa* (butterfly milkweed), and VER= *A. verticillata* (whorled milkweed

| Milkweed Species Comparison | Total Egg Estimate | S.E. | z-ratio | p-value |
| --- | --- | --- | --- | --- |
| INC-LAE | 1.42 | 0.202 | 7.017 | <0.0001 |
| INC-SUL | 0.530 | 0.147 | 3.63 | 0.0041 |
| INC-TUB | 1.01 | 0.173 | 5.86 | <0.0001 |
| INC-VER | 1.21 | 0.187 | 6.49 | <0.0001 |
| LAE-SUL | -0.89 | 0.215 | -4.12 | 0.0005 |
| LAE-SYR | -1.17 | 0.210 | -5.65 | <0.0001 |
| SUL-VER | 0.68 | 0.200 | 3.38 | 0.0092 |
| SYR-TUB | 0.77 | 0.180 | 4.28 | 0.0003 |
| SYR-VER | 0.96 | 0.193 | 5.018 | <0.0001 |

Supplementary Table 4. Pairwise Comparisons for total number of eggs laid on each milkweed species during June-August 2016 when all demonstration sites were combined. A Tukey’s range test was used to adjust p-values for multiple comparisons. EXA= *A. exaltata* (poke milkweed), HIR= *A. hirtella* (tall green milkweed), INC=*A. incarnata* (swamp milkweed), LAE= *C. laeve* (honeyvine milkweed), SPE= *A. speciosa* (showy milkweed), SUL= *A. sullivantii* (prairie milkweed), SYR= *A. syriaca* (common milkweed), TUB= *A. tuberosa* (butterfly milkweed), and VER= *A. verticillata* (whorled milkweed). Bold text signifies a significant difference in which p<0.05.

| Milkweed Species Comparison | Total Egg Estimate | S.E. | z-ratio | p-value |
| --- | --- | --- | --- | --- |
| EXA-INC | -3.87 | 0.99 | -3.87 | 0.034 |
| EXA-SPE | -3.61 | 1.001 | -3.61 | 0.009 |
| EXA-SUL | -3.61 | 1.00 | -3.61 | 0.0009 |
| EXA-SYR | -4.19 | 0.995 | -4.21 | 0.0009 |
| HIR-INC | -1.47 | 0.33 | -4.46 | 0.0003 |
| HIR-SPE | -1.21 | 0.34 | -3.57 | 0.011 |
| HIR-SUL | -1.21 | 0.34 | -3.57 | 0.011 |
| HIR-SYR | -1.79 | 0.321 | -5.56 | <0.0001 |
| INC-LAE | 1.72 | 0.40 | 4.3 | 0.0006 |
| INC-TUB | 2.26 | 0.464 | 4.87 | <0.0001 |
| INC-VER | 1.67 | 0.357 | 4.66 | 0.0001 |
| LAE-SPE | -1.46 | 0.408 | -3.59 | 0.01 |
| LAE-SUL | -1.46 | 0.408 | -3.59 | 0.01 |
| LAE-SYR | -2.04 | 0.39 | -5.19 | <0.0001 |
| SPE-TUB | 2.00 | 0.471 | 4.20 | 0.0007 |
| SPE-VER | 1.41 | 0.37 | 3.85 | 0.0038 |
| SUL-TUB | 2.00 | 0.47 | 4.25 | 0.0007 |
| SUL-VER | 1.41 | 0.36 | 3.85 | 0.0038 |
| SYR-TUB | 2.58 | 0.463 | 5.62 | <0.0001 |
| SYR-VER | 1.99 | 0.351 | 5.67 | <0.0001 |

Supplementary Table 5. Significant pairwise comparisons for total number of eggs laid on each milkweed species during June-July 2016 when all demonstration sites were combined. A Tukey’s range test was used to adjust p-values for multiple comparisons. EXA= *A. exaltata* (poke milkweed), HIR= *A. hirtella* (tall green milkweed), INC=*A. incarnata* (swamp milkweed), LAE= *C. laeve* (honeyvine milkweed), SPE= *A. speciosa* (showy milkweed), SUL= *A. sullivantii* (prairie milkweed), SYR= *A. syriaca* (common milkweed), TUB= *A. tuberosa* (butterfly milkweed), and VER= *A. verticillata* (whorled milkweed

| Milkweed Species Comparison | Total Egg Estimate | S.E. | z-ratio | p-value |
| --- | --- | --- | --- | --- |
| HIR-INC | -1.43 | 0.33 | -4.31 | 0.0006 |
| HIR-SPE | -1.18 | 0.34 | -3.48 | 0.015 |
| HIR-SUL | -1.10 | 0.344 | -3.19 | 0.038 |
| HIR-SYR | -1.72 | 0.323 | -5.3 | <0.0001 |
| INC-LAE | 2.00 | 0.47 | 4.23 | 0.0006 |
| INC-TUB | 2.22 | 0.47 | 4.76 | 0.0001 |
| INC-VER | 1.63 | 0.36 | 4.52 | 0.0002 |
| LAE-SPE | -1.76 | 0.473 | -3.72 | 0.006 |
| LAE-SUL | -1.67 | 0.4751 | -3.50 | 0.013 |
| LAE-SYR | -2.30 | 0.461 | -5.00 | <0.0001 |
| SPE-TUB | 1.97 | 0.472 | 4.18 | 0.001 |
| SPE-VER | 1.39 | 0.368 | 3.76 | 0.0053 |
| SUL-TUB | 1.89 | 0.474 | 3.97 | 0.0023 |
| SUL-VER | 1.29 | 0.37 | 3.49 | 0.014 |
| SYR-TUB | 2.52 | 0.46 | 5.47 | <0.0001 |
| SYR-VER | 1.93 | 0.352 | 5.47 | <0.0001 |

Supplementary Table 6. Significant pairwise comparisons for total number of eggs laid on each milkweed species during July-August 2016 when all demonstration sites were combined. A Tukey’s range test was used to adjust p-values for multiple comparisons. INC=*A. incarnata* (swamp milkweed), LAE= *C. laeve* (honeyvine milkweed), SUL= *A. sullivantii* (prairie milkweed), SYR= *A. syriaca* (common milkweed), TUB= *A. tuberosa* (butterfly milkweed), and VER= *A. verticillata* (whorled milkweed

| Milkweed Species Comparison | Total Egg Estimate | S.E. | z-ratio | p-value |
| --- | --- | --- | --- | --- |
| INC-LAE | 1.74 | 0.40 | 4.35 | 0.0002 |
| INC-TUB | 2.26 | 0.463 | 4.88 | <0.0001 |
| INC-VER | 1.67 | 0.358 | 4.66 | 0.0001 |
| LAE-SUL | -1.48 | 0.41 | -3.63 | 0.0038 |
| LAE-SYR | -2.05 | 0.399 | -5.14 | <0.0001 |
| SUL-TUB | 2.00 | 0.476 | 4.20 | 0.0004 |
| SUL-VER | 1.41 | 0.371 | 3.80 | 0.0020 |
| SYR-TUB | 2.58 | 0.463 | 5.56 | <0.0001 |
| SYR-VER | 1.99 | 0.355 | 5.61 | <0.0001 |

Supplementary Table 7. Pairwise Comparisons for total number of eggs laid on each milkweed species during June-August 2017 when all demonstration sites were combined. A Tukey’s range test was used to adjust p-values for multiple comparisons. EXA= *A. exaltata* (poke milkweed), HIR= *A. hirtella* (tall green milkweed), INC=*A. incarnata* (swamp milkweed), LAE= *C. laeve* (honeyvine milkweed), SPE= *A. speciosa* (showy milkweed), SUL= *A. sullivantii* (prairie milkweed), SYR= *A. syriaca* (common milkweed), TUB= *A. tuberosa* (butterfly milkweed), and VER= *A. verticillata* (whorled milkweed).

| Milkweed Species Comparison | Total Egg Estimate | S.E. | z-ratio | p-value |
| --- | --- | --- | --- | --- |
| EXA-INC | -1.79 | 0.403 | -4.44 | 0.0003 |
| EXA-SYR | -1.49 | 0.413 | -3.6 | 0.0096 |
| HIR-INC | -1.79 | 0.403 | -4.44 | 0.0003 |
| HIR-SYR | -1.49 | 0.413 | -3.60 | 0.0096 |
| INC-LAE | 1.56 | 0.404 | 3.85 | 0.0037 |
| INC-SPE | 1.17 | 0.313 | 3.74 | 0.0057 |
| INC-TUB | 1.79 | 0.403 | 4.44 | 0.0003 |
| INC-VER | 1.54 | 0.362 | 4.24 | 0.0007 |
| SYR-TUB | 1.49 | 0.413 | 3.60 | 0.0096 |
| SYR-VER | 1.24 | 0.374 | 3.3 | 0.026 |
